# Supplementary material
Source: PubMed Central journal article supplement (PMC5972385)
Supplement: NIHMS960165-supplement-4.pdf [file NIHMS960165-supplement-4.pdf]

**Table S2. Relative evolutionary rate of enhancers in neuron related tissues, Related to Figure 1**

| Branch              | All enhancers  | Neuron expressed enhancers |                                             |                       | Neuronal-stem-cell expressed enhancers |                                           |                       |
|---------------------|----------------|----------------------------|---------------------------------------------|-----------------------|----------------------------------------|-------------------------------------------|-----------------------|
|                     | # of enhancers | # of enhancers             | Relative evolutionary rate                  | p-value               | # of enhancers                         | Relative evolutionary rate                | p-value               |
| <b>B4</b>           | 410            | 66                         | $4.03 = \frac{(66/410)}{(1,307/32,748)} \&$ | $<10^{-16}$           | 47                                     | $4.78 = \frac{(47/410)}{(785/32,748)} \&$ | $7.9 \times 10^{-14}$ |
| <b>B3</b>           | 330            | 23                         | 1.75                                        | 0.009                 | 21                                     | 2.65                                      | 0.04                  |
| <b>B2</b>           | 758            | 56                         | 1.85                                        | $4.5 \times 10^{-6}$  | 45                                     | 2.48                                      | 0.01                  |
| <b>B1</b>           | 3,103          | 197                        | 1.59                                        | $5.1 \times 10^{-10}$ | 99                                     | 1.33                                      | 0.03                  |
| <b>B0</b>           | 28,147         | 965                        | 0.86                                        | N/A                   | 573                                    | 0.85                                      | N/A                   |
| <b>All branches</b> | 32,748 *\$     | 1,307 *                    | N/A                                         | N/A                   | 785 *                                  | N/A                                       | N/A                   |

The relative evolutionary rate used to generate Figure 1C. &: Examples of the detailed calculation of relative evolutionary rate. The background control (dominators in &) was calculated using numbers of enhancers on all branches (B0...B4) marked with \*. P-values represent the statistically significant deviation from 1 (Chi-squared test). \$: the evolutionary age classification of all enhancers (n =32748) is provided in Table S1.

**Table S3. Analysis of covariance (ANCOVA) on the evolutionary rate of hEANTs, Related to Figure 1**

| Parameter        | ANCOVA p value       |
|------------------|----------------------|
| SNP density*     | $1.6 \times 10^{-8}$ |
| Enhancer length* | 0.84                 |
| GC content*      | $2.5 \times 10^{-6}$ |
| Enhancer type    | $<10^{-16}$          |

\*These factors were normalized into Z-scores before being used in the linear regression model of ANCOVA.

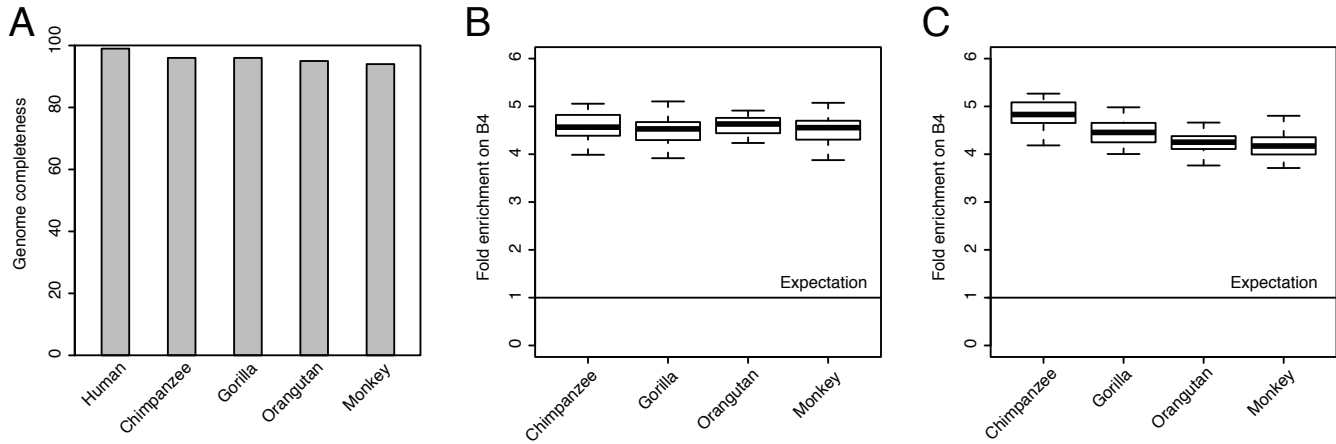

**Figure S1. The effect of genome incompleteness and alignment error on the hEANT evolutionary rate, Related to Figure 1**

(A) Genome incompleteness of different primate species. (B) and (C) The effects of false negative (B) and positive alignment (C) on the acceleration of hEANT evolution. Specifically, we randomly added or removed 10% of the human enhancers aligned to the genome indicated in the x-axis and examined the fold enrichment of EANTs on B4, as shown in Figure 1B. This analysis was repeated 100 times and the results are shown as boxplots. The horizontal line in the box is the median, the bottom and top of the box are the first and third quartiles, and the whiskers extend to 1.5 IQR of the lower quartile and the upper quartile, respectively.

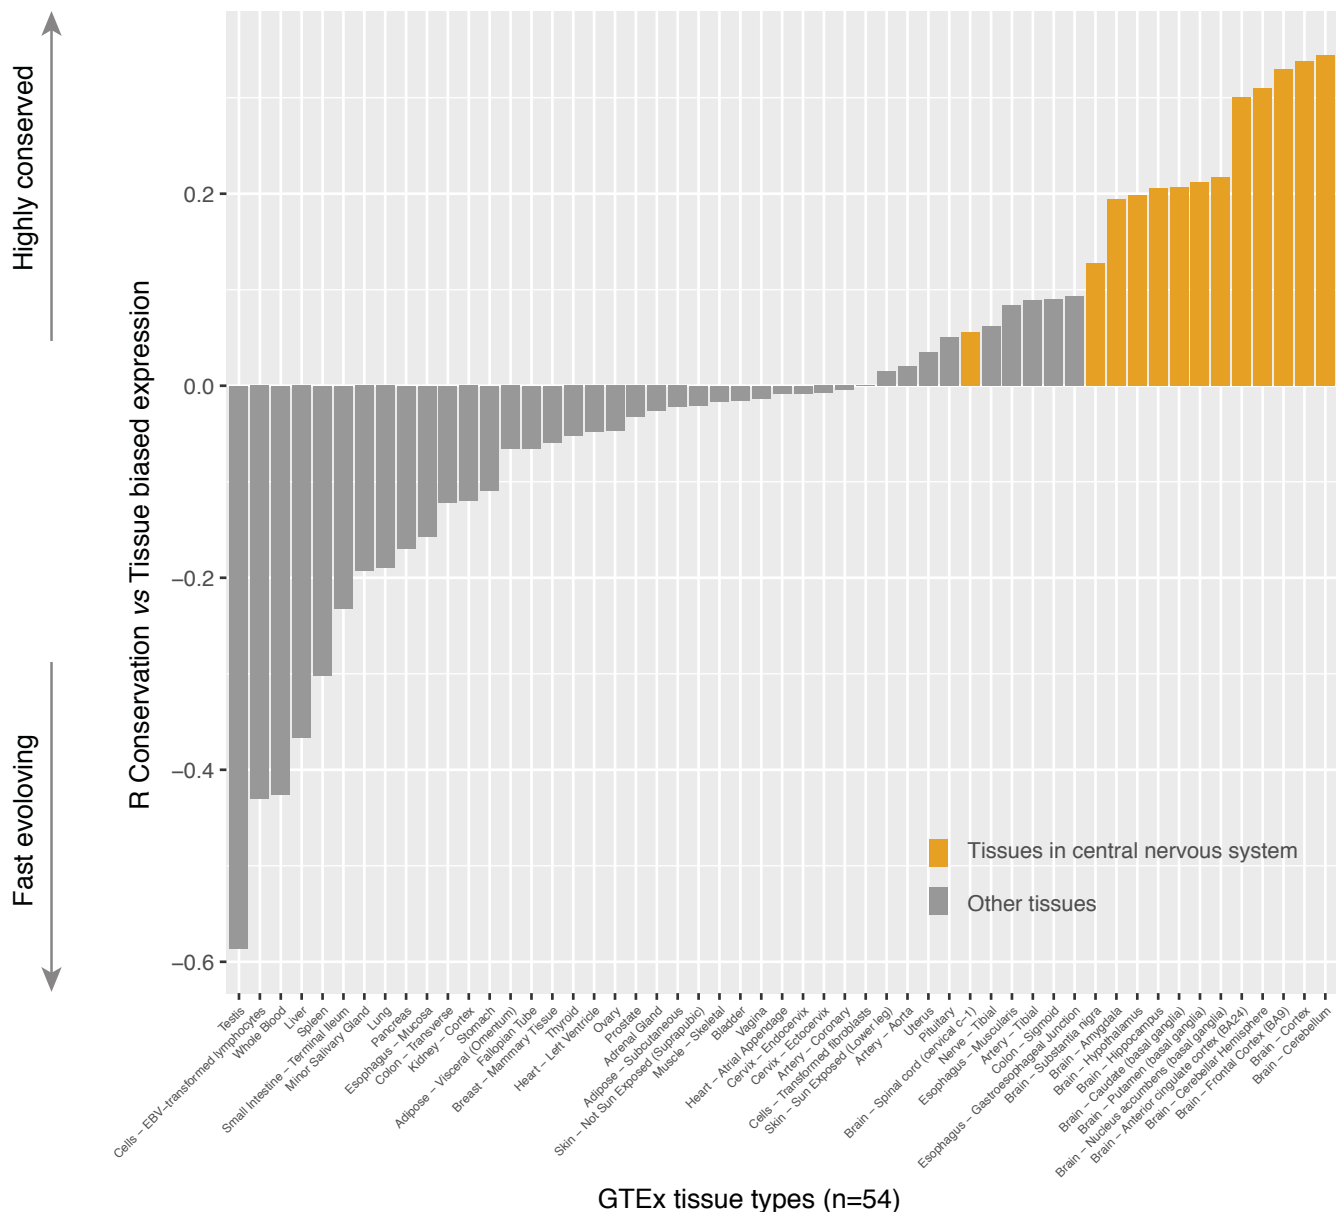

**Figure S2. Conservation analysis on protein-coding genes, Related to Figure 1**  
 For each of 16,001 protein-coding genes, we determined its conservation level (1-dN/dS) and tissue expression bias in the 54 GTEx tissues (STAR Methods). The y-axis shows the correlation (Pearson's R) between gene conservation and expression bias for the tissue type indicated in the x-axis.

**Table S4. TCGA RNA-seq data used in this study, Related to Figure 3**

| Cancer type                                                      | TCGA abbreviation | Sample size (OS) | Sample size (PFS) |
|------------------------------------------------------------------|-------------------|------------------|-------------------|
| Bladder urothelial carcinoma                                     | BLCA              | 405              | 319               |
| Breast invasive carcinoma                                        | BRCA              | 1,092            | 1,001             |
| Cervical squamous cell carcinoma and endocervical adenocarcinoma | CESC              | 303              | 263               |
| Colon adenocarcinoma / Rectum adenocarcinoma                     | COAD/READ         | 616              | 539               |
| Glioblastoma multiforme                                          | GBM               | 152              | 105               |
| Head and neck squamous cell carcinoma                            | HNSC              | 517              | 391               |
| Kidney chromophobe                                               | KICH              | 64               | 62                |
| Kidney renal clear cell carcinoma                                | KIRC              | 448              | 358               |
| Kidney renal papillary cell carcinoma                            | KIRP              | 288              | 267               |
| Brain lower grade glioma                                         | LGG               | 454              | NA                |
| Liver hepatocellular carcinoma                                   | LIHC              | 370              | 319               |
| Lung adenocarcinoma                                              | LUAD              | 504              | 428               |
| Lung squamous cell carcinoma                                     | LUSC              | 491              | 371               |
| Ovarian serous cystadenocarcinoma                                | OV                | 291              | 239               |
| Pancreatic adenocarcinoma                                        | PAAD              | 177              | 138               |
| Prostate adenocarcinoma                                          | PRAD              | 374              | 369               |
| Sarcoma                                                          | SARC              | 258              | 230               |
| Skin cutaneous melanoma                                          | SKCM              | 103              | 89                |
| Stomach adenocarcinoma                                           | STAD              | 407              | 323               |
| Testicular germ cell tumors                                      | TGCT              | 133              | 131               |
| Thyroid carcinoma                                                | THCA              | 500              | 486               |
| Thymoma                                                          | THYM              | 117              | 113               |
| Uterine corpus endometrial carcinoma                             | UCEC              | 316              | 296               |
| Total                                                            | 23 cancer types   | 8,380            | 6,837             |

OS is overall survival; PFS is progression-free survival

**Table S5. GWAS supporting the associations between hEANT neighbors and aging-related diseases, Related to Figure 4**

| <b>hEANT neighbor</b> | <b>Trait</b>              | <b>SNP rs</b> | <b>Chr</b> | <b>Location</b> | <b>Source</b> | <b>PubMed</b> | <b>Analysis ID</b> | <b>Study ID</b> | <b>Study Name</b>                                                                                                                          |
|-----------------------|---------------------------|---------------|------------|-----------------|---------------|---------------|--------------------|-----------------|--------------------------------------------------------------------------------------------------------------------------------------------|
| <i>AOAH</i>           | Parkinson's disease       | 17329669      | 7          | 36851929        | dbGaP         | 16252231      | 2842               | 48              | Mayo-Perlegen LEAPS (Linked Efforts to Accelerate Parkinson's Solutions) Collaboration                                                     |
| <i>AOAH</i>           | Hypertension              | 3807609       | 7          | 36765758        | dbGaP         | NA            | 3042               | 221             | NHLBI Family Heart Study (FamHS)                                                                                                           |
| <i>BMS1</i>           | Hypertension              | 1271546       | 10         | 43505098        | dbGaP         | NA            | 3041               | 221             | NHLBI Family Heart Study (FamHS)                                                                                                           |
| <i>GAS2</i>           | Diabetes mellitus, type 2 | 7111546       | 11         | 22829757        | NHGRI         | 21546767      | NA                 | NA              | Genome-wide association scan for survival on dialysis in African Americans with type-2 diabetes                                            |
| <i>GFRA2</i>          | Alzheimer's disease       | 17581368      | 8          | 21662445        | NHGRI         | 21116278      | NA                 | NA              | Genome-wide association with MRI atrophy measures as a quantitative trait locus for Alzheimer's disease                                    |
| <i>KCNK16</i>         | Diabetes mellitus, type 2 | 1535500       | 6          | 39284050        | NHGRI         | 22158537      | NA                 | NA              | Meta-analysis of genome-wide association studies identifies eight new loci for type-2 diabetes in East Asians                              |
| <i>RBFOX1</i>         | Alzheimer's disease       | 17822719      | 16         | 6583125         | dbGaP         | NA            | 2879               | 219             | GenADA/LONG/Imaging (Genetic Alzheimer's Disease Associations)                                                                             |
| <i>SCN2A</i>          | Parkinson's disease       | 764660        | 2          | 166213297       | dbGaP         | NA            | 2868               | 89              | NINDS Parkinson's Disease                                                                                                                  |
| <i>CDH13</i>          | Hypertension              | 11646213      | 16         | 82642651        | NHGRI         | 19304780      | NA                 | NA              | Genome-wide scan identifies CDH13 as a novel susceptibility locus contributing to blood pressure determination in two European populations |
| <i>CDH13</i>          | Alzheimer's disease       | 2967391       | 16         | 82230392        | dbGaP         | NA            | 2879               | 219             | GenADA/LONG/Imaging (Genetic Alzheimer's Disease Associations)                                                                             |
| <i>SAMD4A</i>         | Parkinson's disease       | 4901519       | 14         | 55019180        | dbGaP         | NA            | 2865               | 126             | CIDR: Genome Wide Association Study in Familial Parkinson's Disease (PD)                                                                   |
| <i>SLIT2</i>          | Osteoporosis              | 1905843       | 4          | 20088059        | dbGaP         | 17903295      | 1790               | 7               | Genetic correlates of longevity and selected age-related phenotypes: a genome-wide association study in the Framingham Study               |
| <i>TLLI</i>           | Osteoporosis              | 10517865      | 4          | 166651016       | dbGaP         | 17903295      | 1787               | 7               | Genetic correlates of longevity and selected age-related phenotypes: a genome-wide association study in the Framingham Study               |

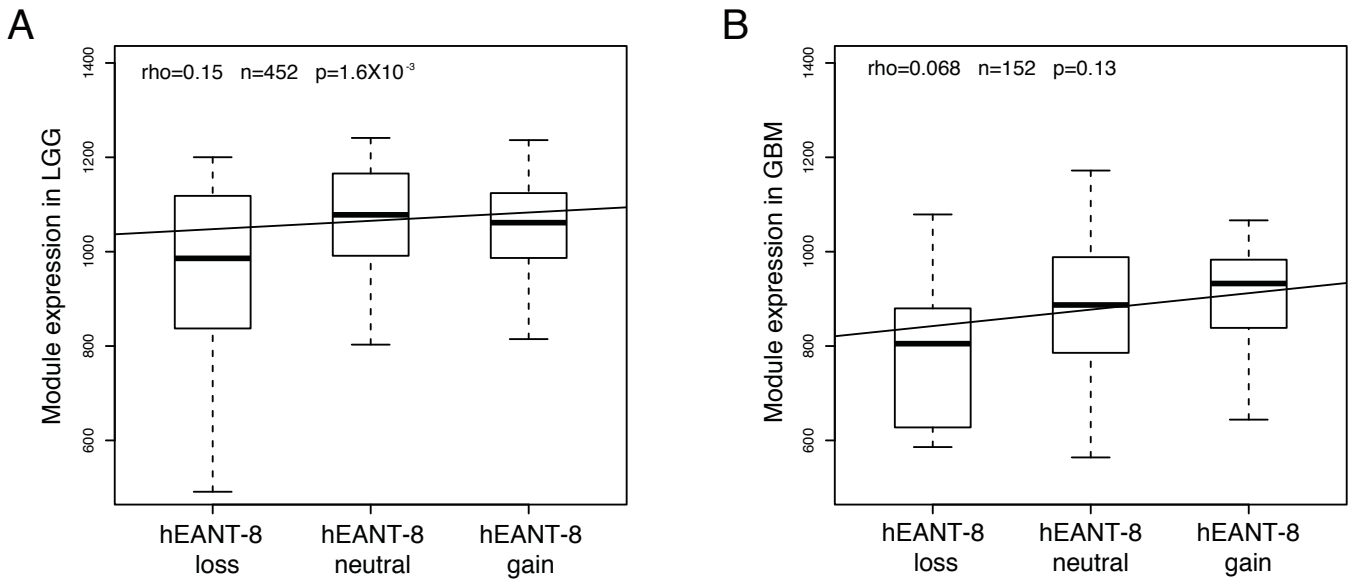

**Figure S3. hEANT-8 is an upstream activator of the co-expression module, Related to Figure 5**

(A) and (B) Module gene expression in different groups of somatic copy number alterations of hEANT-8 (copy number gain or loss) in TCGA LGG dataset (A) and GBM dataset (B). Spearman's correlation coefficient ( $\rho$ ) was used and p value was calculated using Student's t-test. The horizontal line in the box is the median, the bottom and top of the box are the first and third quartiles, and the whiskers extend to 1.5 IQR of the lower quartile and the upper quartile, respectively.

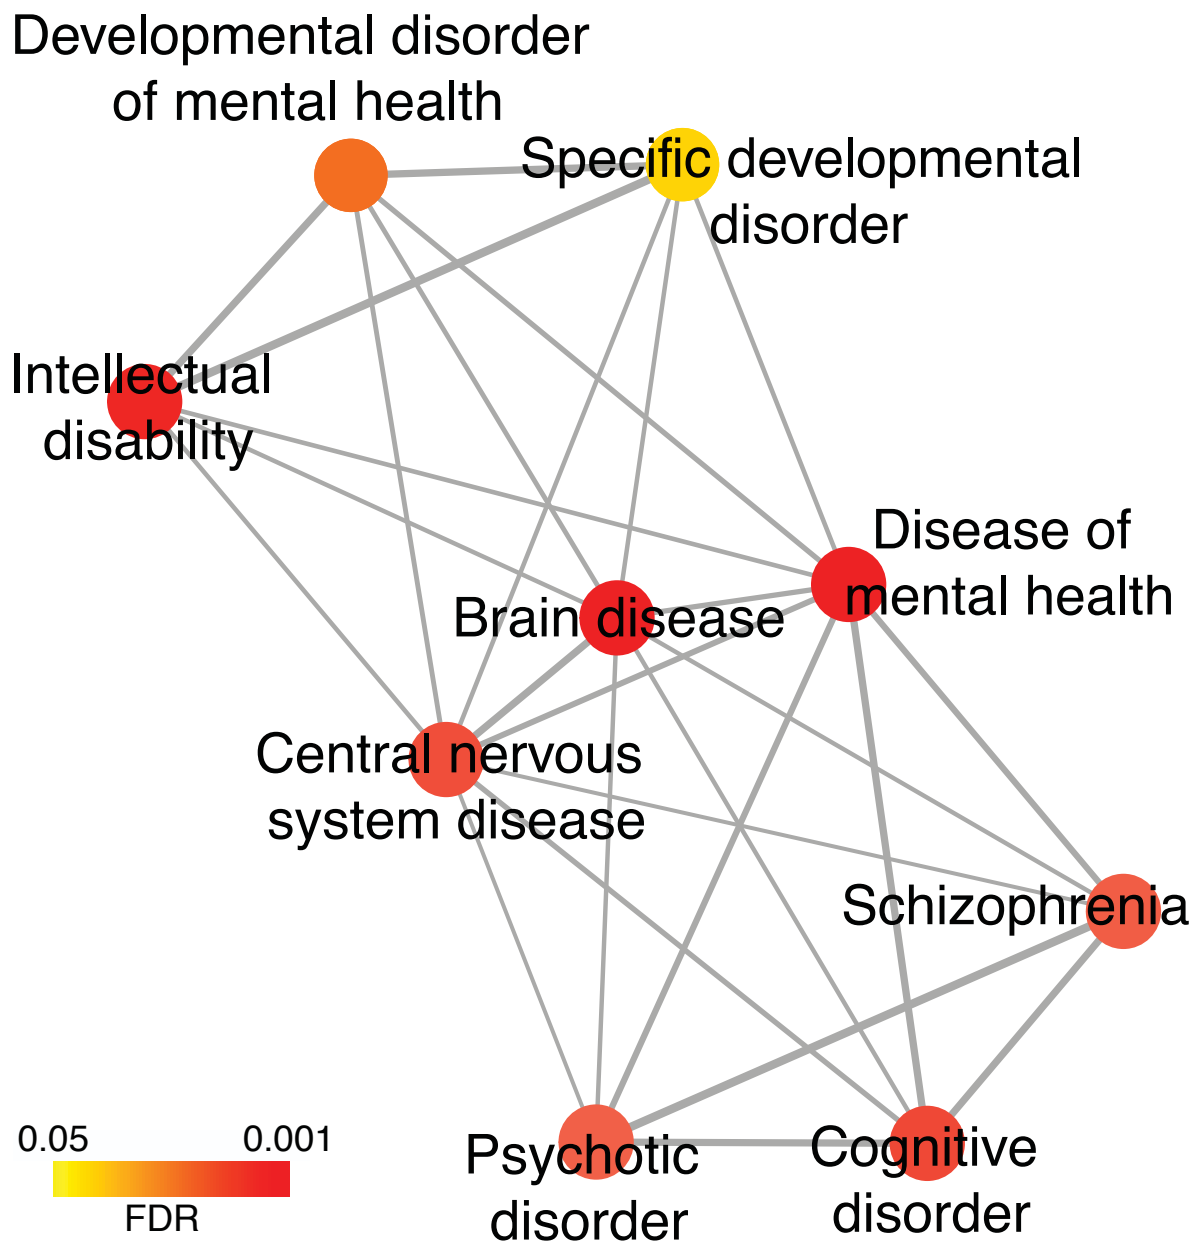

Figure S4. Disease ontology of the hEANT-8 co-expression module, Related to Figure 5

**Table S8. qRT-PCR primers for hEANT-8 coexpression module genes in this study, Related to Figure 5**

| <b>Gene</b>           | <b>Upstream primer</b> | <b>Downstream primer</b> |
|-----------------------|------------------------|--------------------------|
| <i>ACTB</i> (control) | ATTGGCAATGAGCGGTTC     | CGTGGATGCCACAGGACT       |
| <i>CDK5R1</i>         | TTCACACAGCACCTCCTCTC   | ATCCTGTGGATGCAACGTAA     |
| <i>CELF3</i>          | AAAGGAGGCTTGGAAGGTTA   | CTTAGGGCTTATGCAGTCCA     |
| <i>CHRNA2</i>         | AGTCTGACAGGCAACTGGAG   | CCAGGAATGGAATGAAACTG     |
| <i>FAM57B</i>         | CAATTTGCTGTGCCCTACTT   | ATGAGGAACTCCTTGTGCAG     |
| <i>GDAP1L1</i>        | GCCGACATCAAGACTCAACT   | GAGGGTGTGCTCATGGTATC     |
| <i>GPRIN1</i>         | AAGAATGGGCCTGTATCCTC   | TTGCTGAAGCCGTAGTATCC     |
| <i>INA</i>            | TACAGGAAACTGCTGGAAGG   | GTGATAGCCCAGTGGATGAG     |
| <i>KCNIP2</i>         | CAAGGAGACTCCAGCACCTA   | GGTACGTGTACTTGCCCATC     |
| <i>LICAM</i>          | GCCAAAGGAGACAGTGAAGC   | GCGTGGCAGATGTAGTCTGA     |
| <i>RUNDC3A</i>        | ACCACCAGACGGTTCTATGA   | TGCGTGAACCTTAGGTAGGG     |
